# Supplementary material for: Using spatial equity analysis in the process evaluation of environmental interventions to tackle obesity: the healthy towns programme in England
Source: Int J Equity Health. 2013 Jun 17;12:43. doi: 10.1186/1475-9276-12-43 (PMC3693867; doi:10.1186/1475-9276-12-43)
Supplement: Additional file 1 — Target populations and mean targeting ratio, by type and category of intervention. [file 1475-9276-12-43-S1.pdf]

## **Additional file 1**

Target populations and mean targeting ratio, by type and category of intervention

|                                 | Average ratio                                        | BME <sup>a</sup>         | Children 0-18               | Retired households       | Socio-economic disadvantage | Families                   | Children 5-19            |
|---------------------------------|------------------------------------------------------|--------------------------|-----------------------------|--------------------------|-----------------------------|----------------------------|--------------------------|
| <i>Type</i>                     |                                                      |                          |                             |                          |                             |                            |                          |
| Advice/information              | 0.61** [7] <sup>b</sup><br>(0.42, 0.80) <sup>c</sup> | N/A <sup>d</sup>         | 0.59* [2]<br>(0.50, 0.69)   | N/A                      | 0.72 [1]                    | 0.49** [2]<br>(0.47, 0.50) | N/A                      |
| Cafe/food co-ops                | 1.41 [7]<br>(0.94, 1.88)                             | N/A                      | 1.05 [1]                    | N/A                      | 1.53 [1]                    | 0.93 [1]                   | N/A                      |
| Facilities for cycling/walking  | 1.01 [20]<br>(0.89, 1.14)                            | N/A                      | 1.00 [5]<br>(0.84, 1.17)    | N/A                      | 1.09 [5]<br>(0.53, 1.65)    | 0.96 [5]<br>(0.76, 1.15)   | N/A                      |
| Food growing                    | 1.21** [70]<br>(1.07, 1.35)                          | 0.77 [6]<br>(0.32, 1.22) | 1.08 [17]<br>(0.98, 1.17)   | 1.05 [1]                 | 1.42** [7]<br>(1.20, 1.64)  | 1.06 [15]<br>(0.91, 1.20)  | 1.11 [2]<br>(0.89, 1.33) |
| Green gym/dance studio          | 1.04 [35]<br>(0.96, 1.11)                            | N/A                      | 0.99 [8]<br>(0.88, 1.09)    | N/A                      | 1.12 [7]<br>(0.76, 1.48)    | 0.97 [7]<br>(0.84, 1.10)   | 0.82 [1]                 |
| Outdoor play area/green space   | 1.15** [155]<br>(1.08, 1.21)                         | 0.79 [1]                 | 1.06 [48]<br>(0.99, 1.14)   | 1.43 [1]                 | 1.27** [35]<br>(1.12, 1.43) | 1.01 [25]<br>(0.91, 1.12)  | N/A                      |
| Walking/cycling routes          | 1.02 [37]<br>(0.95, 1.09)                            | N/A                      | 0.97 [14]<br>(0.90, 1.03)   | 1.43 [1]                 | 1.69 [1]                    | 0.96 [10]<br>(0.81, 1.11)  | 0.96 [4]<br>(0.85, 1.08) |
| Walking/cycling mapping/signage | 1.10** [118]<br>(1.04, 1.15)                         | N/A                      | 1.12** [33]<br>(1.04, 1.20) | 0.92 [7]<br>(0.59, 1.24) | 1.33* [15]<br>(1.09, 1.57)  | 1.08 [33]<br>(0.99, 1.17)  | N/A                      |
| <i>Category</i>                 |                                                      |                          |                             |                          |                             |                            |                          |
| Active travel                   | 1.09** [102]<br>(1.04, 1.15)                         | N/A                      | 1.09* [33]<br>(1.02, 1.16)  | 0.90 [5]<br>(0.39, 1.40) | 1.60** [6]<br>(1.29, 1.92)  | 1.09 [29]<br>(0.99, 1.19)  | 0.96 [4]<br>(0.85, 1.08) |
| Food systems                    | 1.23** [78]<br>(1.10, 1.36)                          | 0.77 [6]<br>(0.32, 1.22) | 1.07 [18]<br>(0.98, 1.17)   | 1.05 [1]                 | 1.44** [8]<br>(1.25, 1.62)  | 1.05 [16]<br>(0.91, 1.18)  | 1.11 [2]<br>(0.89, 1.33) |
| Healthy lifestyle               | 0.75* [11]<br>(0.57, 0.93)                           | 0.79 [1]                 | 0.76 [3]<br>(0.21, 1.32)    | N/A                      | 0.72 [1]                    | 0.72 [3]<br>(-0.03, 1.48)  | N/A                      |
| Physical activity               | 1.11** [268]<br>(1.06, 1.15)                         | N/A                      | 1.05 [74]<br>(0.99, 1.10)   | 1.20 [4]<br>(0.83, 1.57) | 1.22** [57]<br>(1.11, 1.34) | 0.99 [50]<br>(0.92, 1.05)  | 0.82 [1]                 |

Continued over...

(Continued)

|                                 | Children 8-13             | Resident adults          | Over 50s | Disabilities and/or learning difficulties | Inactive/overweight        | Single parent families     | Households living in social housing |
|---------------------------------|---------------------------|--------------------------|----------|-------------------------------------------|----------------------------|----------------------------|-------------------------------------|
| <i>Type</i>                     |                           |                          |          |                                           |                            |                            |                                     |
| Advice/information              | N/A                       | N/A                      | N/A      | N/A                                       | 1.01 [1]                   | 0.38 [1]                   | N/A                                 |
| Cafe/food co-ops                | N/A                       | 1.58 [5]<br>(0.96, 2.19) | N/A      | N/A                                       | N/A                        | N/A                        | N/A                                 |
| Facilities cycling/walking      | N/A                       | N/A                      | N/A      | N/A                                       | 1.01 [5]<br>(0.83, 1.19)   | N/A                        | N/A                                 |
| Food growing                    | N/A                       | 1.01 [1]                 | N/A      | 1.10 [7]<br>(0.92, 1.29)                  | 1.25** [3]<br>(1.17, 1.32) | 1.59** [2]<br>(1.56, 1.61) | 1.88 [9]<br>(0.92, 2.85)            |
| Green gym/dance studio          | N/A                       | N/A                      | 1.24 [1] | N/A                                       | 1.02 [9]<br>(0.92, 1.12)   | 1.28 [2]<br>(1.08, 1.48)   | N/A                                 |
| Outdoor play area/green space   | 1.06 [23]<br>(0.96, 1.15) | N/A                      | N/A      | 0.89 [1]                                  | 1.05 [12]<br>(0.93, 1.16)  | 1.40 [7]<br>(1.08, 1.71)   | 3.38 [2]<br>(-0.16, 6.92)           |
| Walking/cycling routes          | N/A                       | N/A                      | N/A      | N/A                                       | 1.03 [6]<br>(0.89, 1.18)   | 1.50 [1]                   | N/A                                 |
| Walking/cycling mapping/signage | N/A                       | N/A                      | N/A      | N/A                                       | 0.95 [15]<br>(0.87, 1.03)  | 1.08 [15]<br>(0.88, 1.28)  | N/A                                 |
| <i>Category</i>                 |                           |                          |          |                                           |                            |                            |                                     |
| Active travel                   | N/A                       | N/A                      | N/A      | N/A                                       | 0.97 [11]<br>(0.88, 1.06)  | 1.25 [6]<br>(0.90, 1.60)   | N/A                                 |
| Food systems                    | N/A                       | 1.48 [6]<br>(0.95, 2.02) | N/A      | 1.10 [7]<br>(0.92, 1.29)                  | 1.25** [3]<br>(1.17, 1.32) | 1.59** [2]<br>(1.56, 1.61) | 1.88 [9]<br>(0.92, 2.85)            |
| Healthy lifestyle               | N/A                       | N/A                      | N/A      | 0.89 [1]                                  | 1.01 [1]                   | 0.38 [1]                   | N/A                                 |
| Physical activity               | 1.06 [23]<br>(0.96, 1.15) | N/A                      | 1.24 [1] | N/A                                       | 1.02 [36]<br>(0.96, 1.07)  | 1.18* [19]<br>(1.00, 1.37) | 3.38 [2]<br>(-0.16, 6.92)           |

Notes: <sup>a</sup>BME: Black and minority ethnic; <sup>b</sup>[n]; <sup>c</sup>(CIs 95% upper, lower); \* $p < 0.05$ , \*\*  $p < 0.01$  values from Student's t-tests comparing mean ratio with a ratio of 1; <sup>d</sup>N/A - no infrastructure in category
